# Supplementary material
Source: MDPI journal article supplement (https://www.mdpi.com/2571-6255/6/5/195)
Supplement: s1 [file s1 › fire-2250308-supplementary.pdf]

## Supplementary material

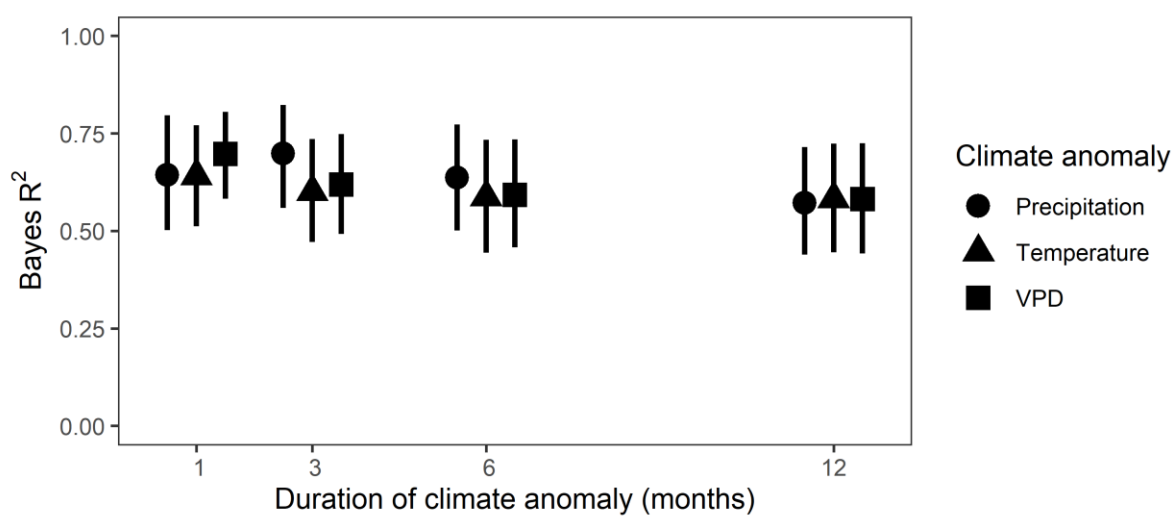

Figure S1. The Bayes  $R^2$  of the median (dot) and 5<sup>th</sup>-95<sup>th</sup> percentile (whisker) of the posterior distribution for the models using precipitation (circles), temperature (triangles) and vapour pressure deficit (VPD, squares) anomalies over one, three six and 12 month periods.

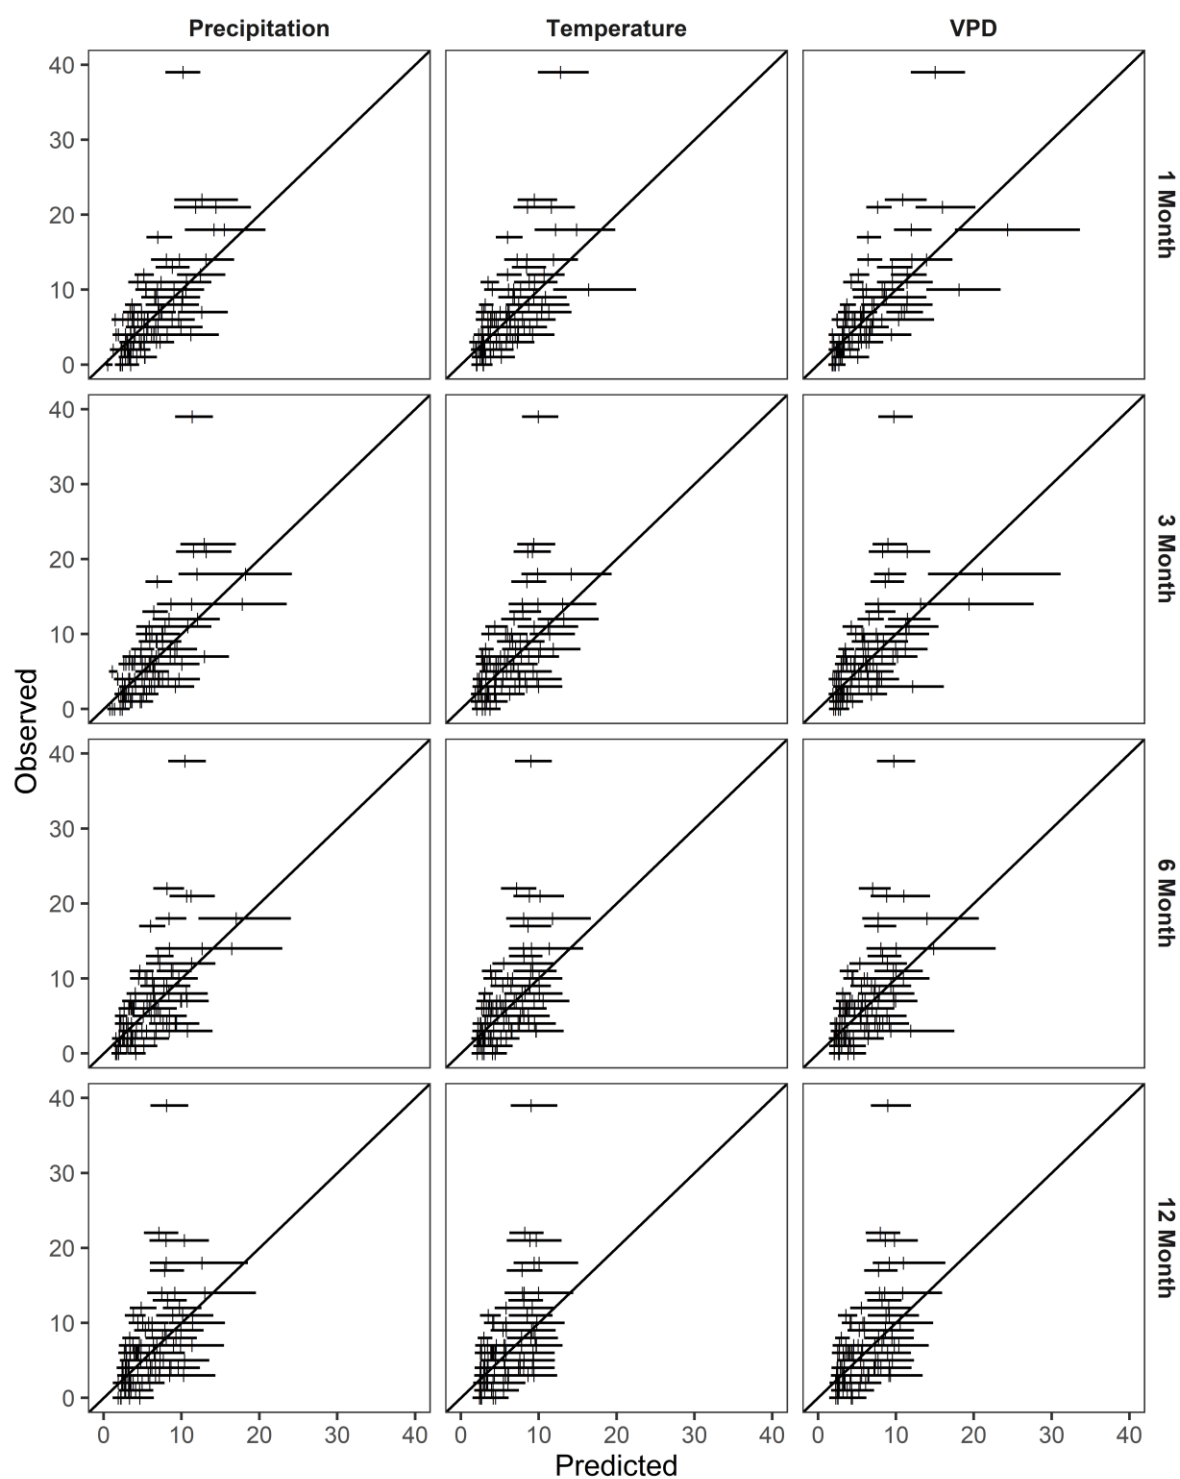

Figure S2. The observed number of monthly ignitions plotted against the median (vertical line) and the 90<sup>th</sup> percentile of the posterior distribution (horizontal line) for the 12 models using precipitation, temperature and vapour pressure deficit (VPD) anomalies over one, three, six and 12 months..

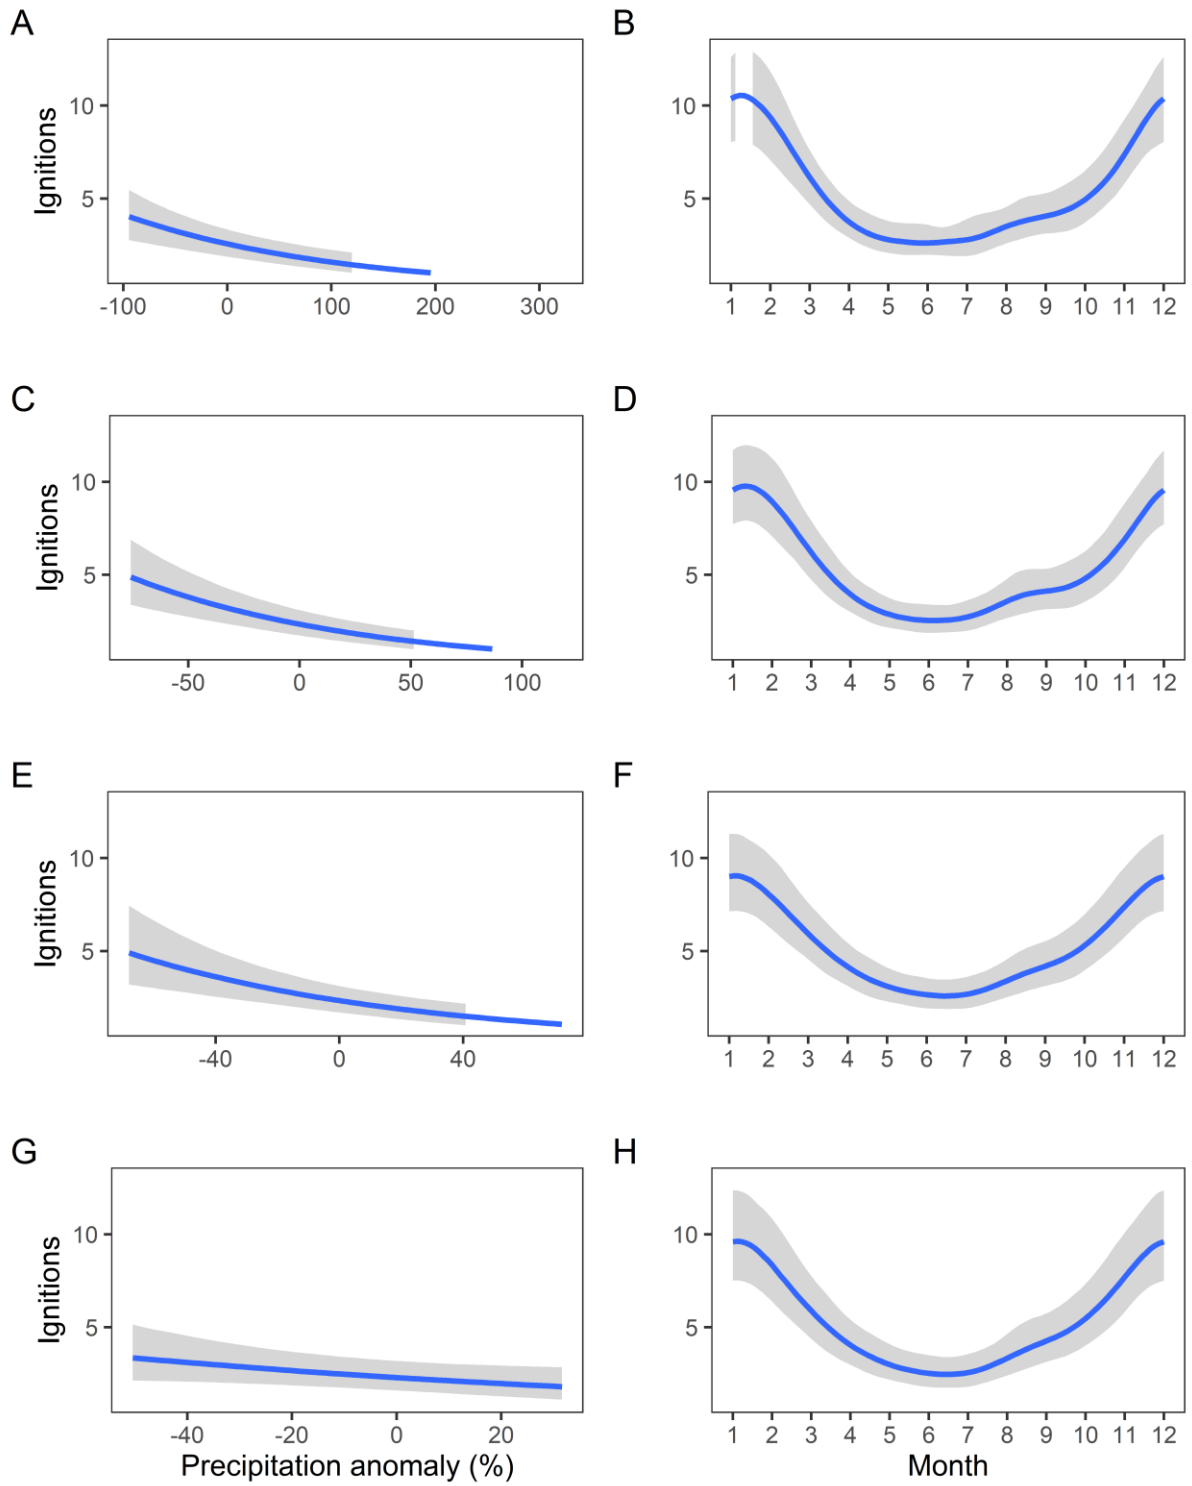

Figure S3. Marginal effects plots for models predicting ignitions in response to the month and precipitation anomaly over one (a and b), three (c and d), six (e and f) and 12 (g and h) months. Figures depict the median (solid blue line) and 90<sup>th</sup> percentile (grey band) of the posterior predictions.

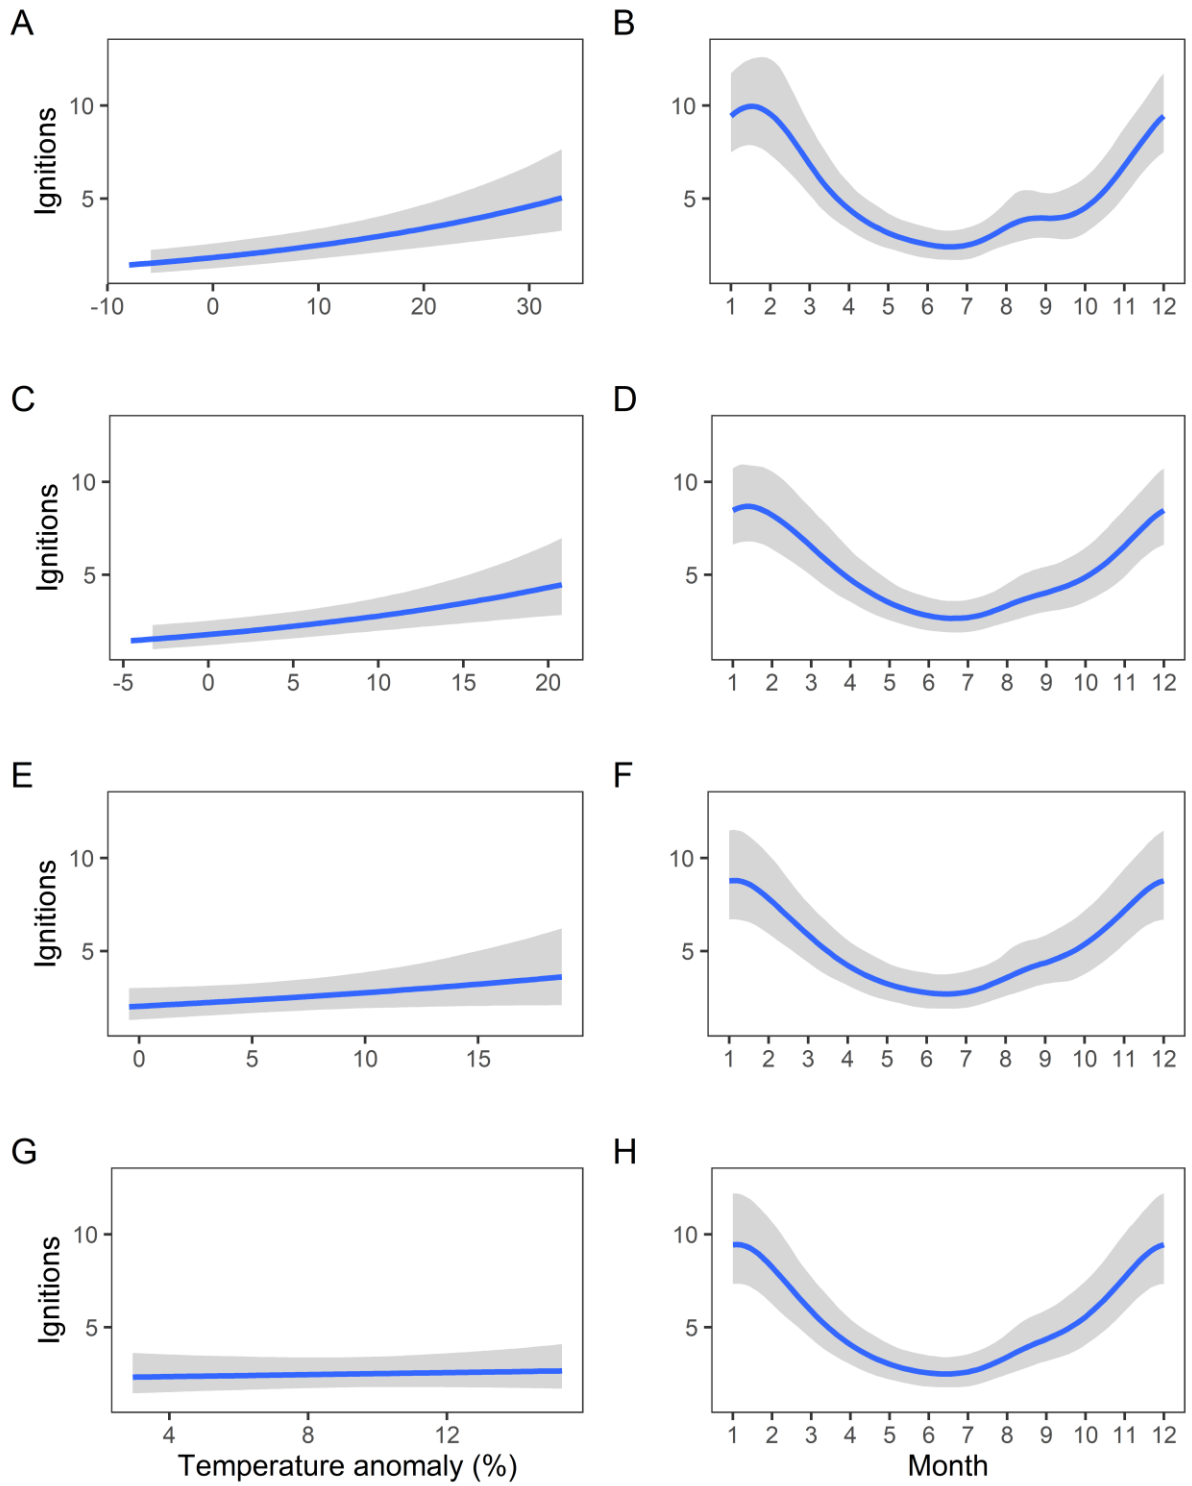

Figure S4. Marginal effects plots for models predicting ignitions in response to the month and temperature anomaly over one (a and b), three (c and d), six (e and f) and 12 (g and h) months. Figures depict the median (solid blue line) and 90<sup>th</sup> percentile (grey band) of the posterior predictions.

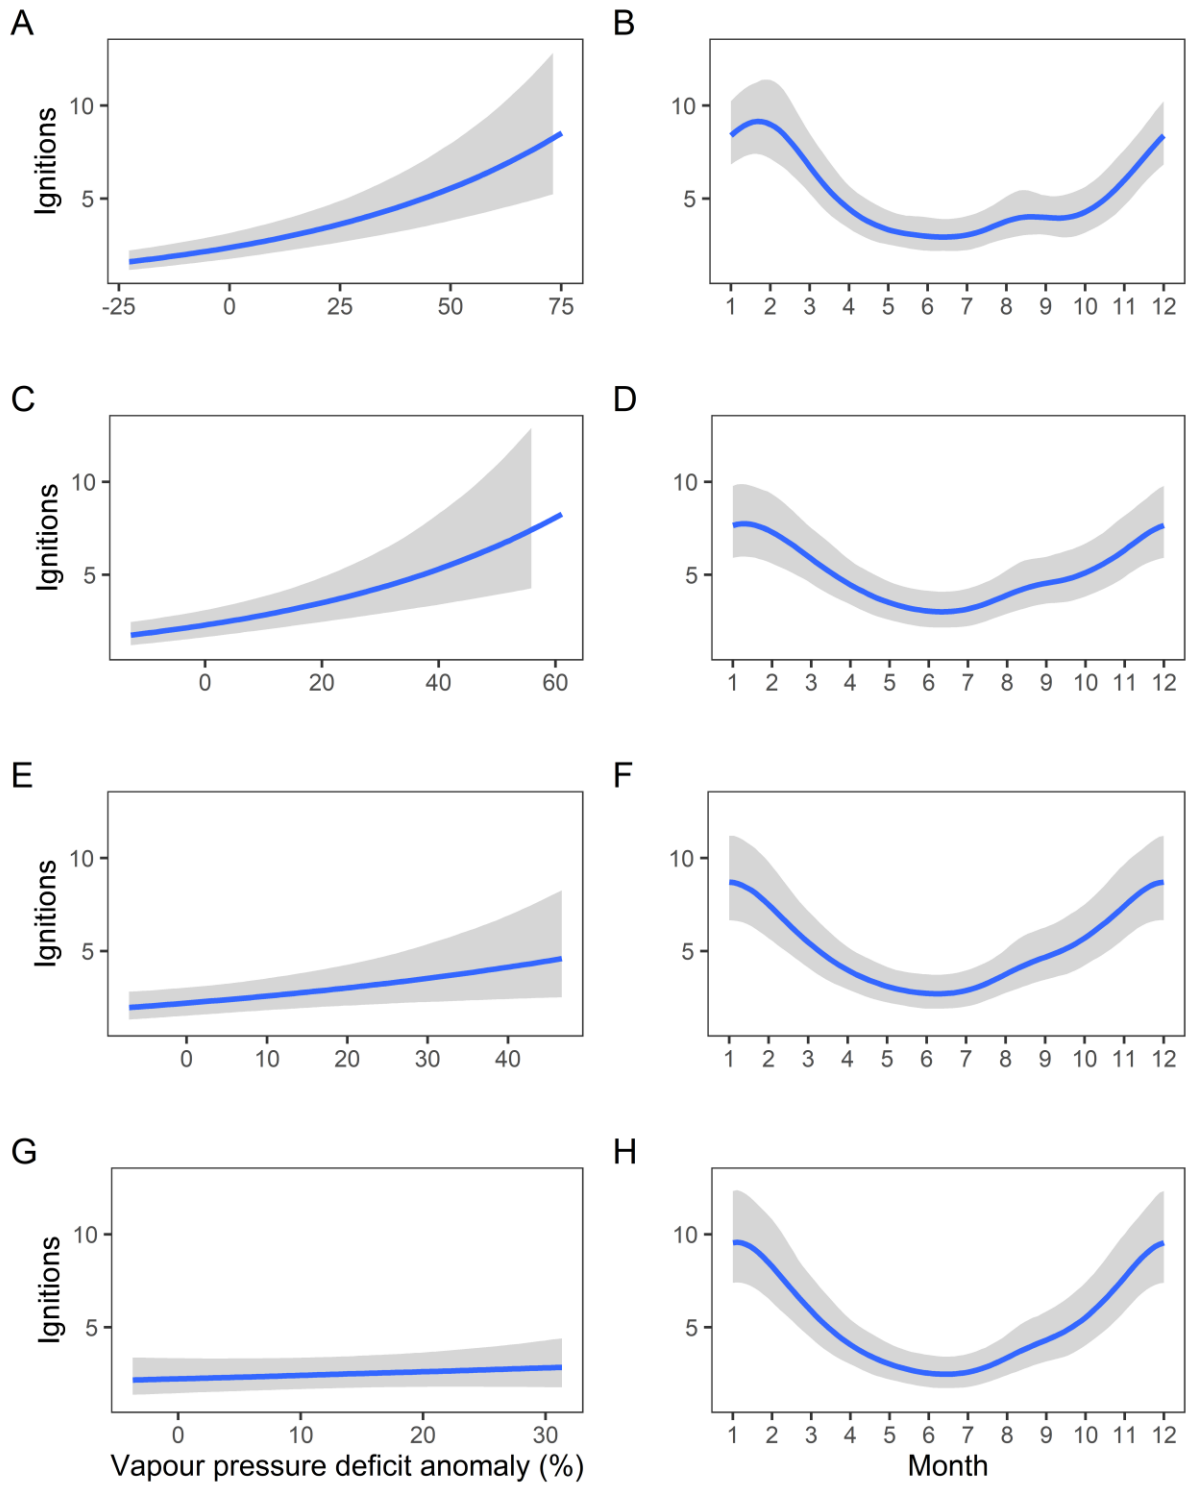

Figure S5. Marginal effects plots for models predicting ignitions in response to the month and vapour pressure deficit anomaly over one (a and b), three (c and d), six (e and f) and 12 (g and h) months. Figures depict the median (solid blue line) and 90<sup>th</sup> percentile (grey band) of the posterior predictions.
